# Supplementary figures and images for: Microencapsulation of a Pickering Oil/Water Emulsion Loaded with Vitamin D3
Source: MDPI journal article supplement (doi:10.3390/gels9030255), 2023-03-22

Supplementary materials

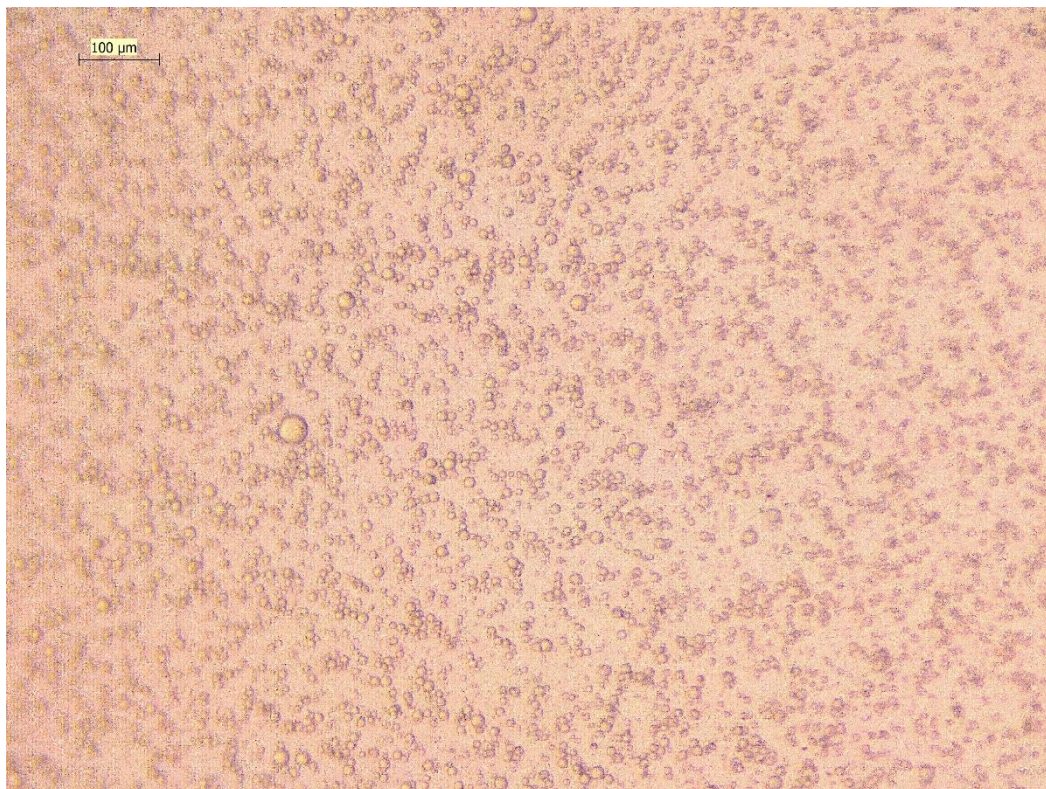

**Figure S1:** stereomicroscope image of OL-2 emulsion.

Supplement: s1 [file s1]
